# Supplementary material for: Rubus canadensis virus 1, a novel betaflexivirus identified in blackberry
Source: Springer Nature journal article supplement (doi:10.1007/s00705-012-1484-7), 2012-10-05
Supplement: MOESM1 [file 8648956]

**Supplementary material**

**Table S1.** List of oligonucleotide primers used for the RuCV-1 survey.

| **Primer name** | **Nucleotide sequence (5’ to 3’)** | **Expected size of PCR product (bp)** |
| --- | --- | --- |
| RuCVCP-F | TGGCAACTGACTCCAATGAG | 490 |
| RuCVCP-R | TTCAGGAAGTTGGCTGGAGG |
|  |  |  |
| RuCVPOL-F | caaagctggccagactcttg | 570 |
| RuCVPOL-R | CACCATCCGCAAAAGGTAGG |
|  |  |  |
| RuCVTGB-F | AGAACAAGTGTGCCTCTGTC | 344 |
| RuCVTGB-R | CTGCTCAATCTATGGGAGTTC |

**Figure S1.** Conserved motifs present in the carboxy termini of coat proteins in RuCV-1 and recognized or putative foveaviruses. Asterisks indicate identical residues in all proteins, whereas semicolons indicate amino acids conserved in at least 50% of analyzed proteins**.**

ASPV ARHCADVGASDKSALLG-(23)-TLRQYCAFYAKHVWN-(xx)-AAFDFFFGVESTASLEP

ApLV ARHCADVGASDKSTLLG-(23)-TLRQYCAYYAKHVWN-(xx)-AAFDFFFGVESSAALEP

PCMoV ARHCADVGSSNQSRLIG-(23)-TLRQFCAYYAKMVWN-(xx)-AAFDFFYGVDSSAALEP

GRSPaV ARHCSDVGSSQRSTLIG-(21)-TLRQFCSLYAKIVWN-(xx)-AAFDFFLGVTDESALEP

APV1 ARYCADAGSSESTEFVG-(22)-TLRRFCGFYAKIVWN-(xx)-AAFDFFVHVSNNAALEP

RuCV-1 ALHCADVGSSELTELAG-(22)-TLRQFCSLYAKIVWN-(xx)-AAFDFFDAVLNPAALEP

*::*:*:*:* : : * ***::* *** *** ****** :* ::***
